# Supplementary material for: A Novel Wide-Range Freshwater Cyanophage MinS1 Infecting the Harmful Cyanobacterium Microcystis aeruginosa
Source: MDPI journal article supplement (doi:10.3390/v14020433), 2022-02-20
Supplement: s1 [file s1]

## Supplementary Figures

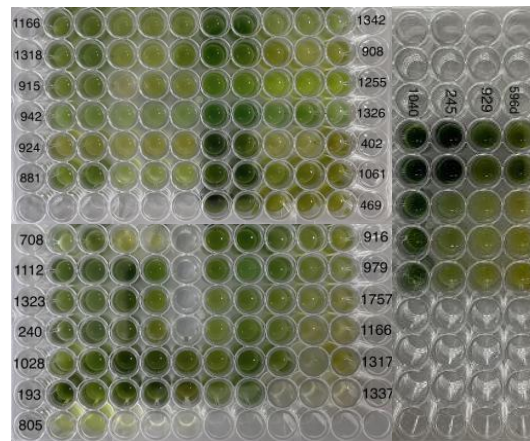

(a)

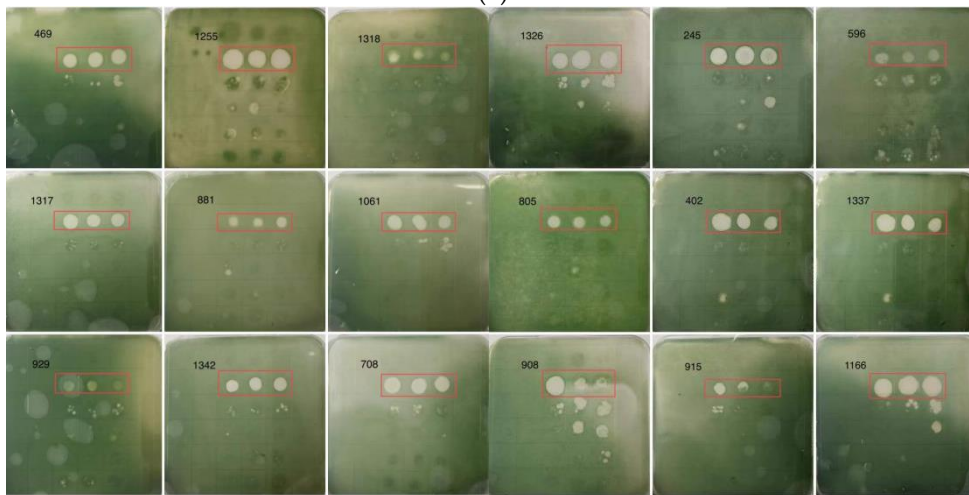

(b)

**Figure S1: (a) Phenotypic photographs of cyanobacterial cultures within the host range experiments. (b) Phage spots formed by the cyanophage MinS1 on susceptible cyanobacteria strains.**

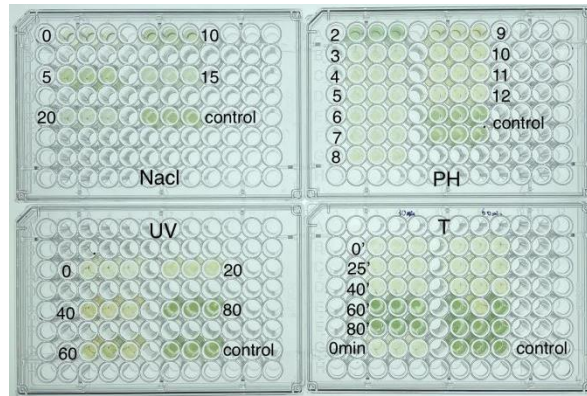

Figure S2: Status of host algae infected by MinS1 treated under different conditions.

### Supplementary Tables

**Table S1: MinS1 classification, general features, and genome sequencing information.**

| Item                             | Description                                             |
|----------------------------------|---------------------------------------------------------|
| Classification                   | Order Caudovirales, Family Siphoviridae                 |
| Particle shape                   | isometric hexagon head with a long non-contractile tail |
| Submitted to GenBank             | MZ923504                                                |
| Investigation type               | Virus                                                   |
| Geographic location              | Mayang Stream, Fujian, China                            |
| Altitude, latitude and longitude | 13m, 24°32'37.81" N, 117°46'26.40" E                    |
| Depth                            | 0.2m                                                    |
| Collection date and time         | November 23, 2020 at 10:17 am                           |
| Temperature                      | 20°C                                                    |
| Environment (material)           | Freshwater                                              |
| Sequencing method                | Illumina Miseq                                          |
| Number of contigs                | 1                                                       |
| Assembly method                  | SPAdes 3.13.0                                           |
| Finishing quality                | Finish (complete)                                       |
